# Supplementary material for: BaZnBe2(BO3)2F2: a novel zinc-beryllium borate with SBBO-type structure overcoming the polymorphism problem
Source: Royal Society of Chemistry journal article supplement (doi:10.1039/d0dt04153j), 2021-01-01
Supplement: d0dt04153j1.pdf [file d0dt04153j1.pdf]

## Supporting Information

BaZnBe<sub>2</sub>(BO<sub>3</sub>)<sub>2</sub>F<sub>2</sub>: a novel zinc-beryllium borate with SBBO-type structure overcoming the polymorphism problem

Ruixin Guo<sup>a,b</sup>, Xiaomeng Liu<sup>a,b</sup>, Ce Tao<sup>a,b</sup>, Changcheng Tang<sup>a,b</sup>, Mingjun Xia<sup>a,b</sup>, Lijuan Liu<sup>a,b,\*</sup>, Zheshuai Lin<sup>a,b</sup> and Xiaoyang Wang<sup>a,b</sup>

<sup>a</sup>Beijing Center for Crystal Research and Development, Key Laboratory of Functional Crystals and Laser Technology, Technical Institute of Physics and Chemistry, Chinese Academy of Sciences, Beijing 100190, China

<sup>b</sup>Center of Materials Science and Optoelectronics Engineering, University of Chinese Academy of Sciences, Beijing 100049, China

Corresponding Author:

E-mail: llj@mail.ipc.ac.cn

orcid.org/0000-0002-6856-2953;

## Table of Contents

### Result and discussion

**Figure S1.** Powder XRD patterns of  $\text{BaZnBe}_2(\text{BO}_3)_2\text{F}_2$ .

**Table S1.** Atomic coordinates and equivalent isotropic displacement parameters ( $\text{\AA}^2$ ) for  $\text{BaZnBe}_2(\text{BO}_3)_2\text{F}_2$

**Table S2.** Atomic displacement parameters ( $\text{\AA}^2$ ) for  $\text{BaZnBe}_2(\text{BO}_3)_2\text{F}_2$

**Table S3.** Selected bond lengths ( $\text{\AA}$ ) and bond angles (deg.) for  $\text{BaZnBe}_2(\text{BO}_3)_2\text{F}_2$

**Table S4.** Selected bond angles (deg.) for  $\text{BaZnBe}_2(\text{BO}_3)_2\text{F}_2$

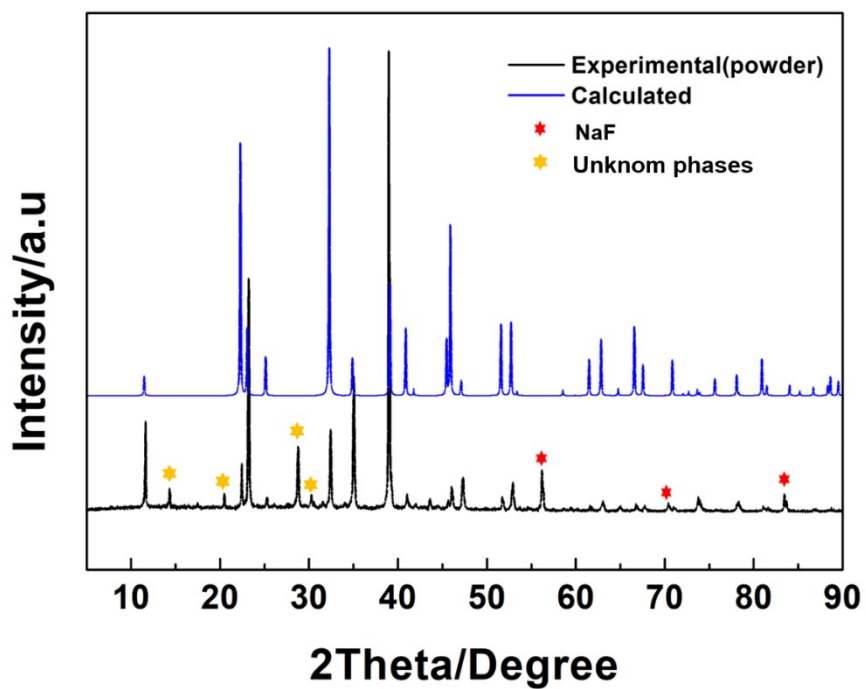

**Figure S1.** Powder XRD patterns of  $\text{BaZnBe}_2(\text{BO}_3)_2\text{F}_2$ .

As shown in Figure S1, the XRD data measured by the polycrystal powders is roughly consistent with the calculated curve from the CIF data. (Unfortunately, the pure phase has been attempted many times, without success.) There are some extra peaks which are from the raw material of NaF, and four peaks of unknown phases.

**Table S1.** Atomic coordinates and equivalent isotropic displacement parameters ( $\text{\AA}^2$ ) for  $\text{BaZnBe}_2(\text{BO}_3)_2\text{F}_2$ .

| <b>BaZnBe<sub>2</sub>(BO<sub>3</sub>)<sub>2</sub>F<sub>2</sub></b> |             |             |              |             |
|--------------------------------------------------------------------|-------------|-------------|--------------|-------------|
| Atom                                                               | x           | y           | z            | U(eq)       |
| Zn                                                                 | 0.0000      | -1.0000     | 0.0000       | 0.0055 (3)  |
| O1                                                                 | -0.3488 (7) | -0.9730 (7) | -0.1728 (4)  | 0.0059 (6)  |
| F1                                                                 | 0.3333      | -0.3333     | 0.1728 (10)  | 0.0035 (10) |
| B1                                                                 | -0.6667     | -1.3333     | -0.4353 (5)  | 0.0082 (7)  |
| Ba                                                                 | 0.0000      | -1.0000     | 0.5000       | 0.0083 (2)  |
| Be1                                                                | -0.6667     | -1.3333     | -0.2256 (11) | -0.0017(10) |

**Table S2.** Anisotropic displacement parameters ( $\text{\AA}^2$ ) for  $\text{BaZnBe}_2(\text{BO}_3)_2\text{F}_2$ .

| <b>BaZnBe<sub>2</sub>(BO<sub>3</sub>)<sub>2</sub>F<sub>2</sub></b> |                 |                 |                 |                 |                 |                 |
|--------------------------------------------------------------------|-----------------|-----------------|-----------------|-----------------|-----------------|-----------------|
| Atom                                                               | U <sup>11</sup> | U <sup>22</sup> | U <sup>33</sup> | U <sup>23</sup> | U <sup>13</sup> | U <sup>12</sup> |
| Zn                                                                 | 0.0053 (3)      | 0.0053 (3)      | 0.0060 (5)      | 0.00266(17)     | 0.000           | 0.000           |
| O1                                                                 | 0.0053 (9)      | 0.0048 (9)      | 0.0081 (10)     | 0.0030 (7)      | -0.0014 (7)     | -0.0008 (7)     |
| F1                                                                 | 0.0039 (10)     | 0.0039 (10)     | 0.0029 (14)     | 0.0019 (5)      | 0.000           | 0.000           |
| B1                                                                 | 0.0083 (7)      | 0.0083 (7)      | 0.0080 (11)     | 0.0041 (4)      | 0.000           | 0.000           |
| Ba                                                                 | 0.0070 (3)      | 0.0070 (3)      | 0.0109 (3)      | 0.00352(13)     | 0.000           | 0.000           |
| Be1                                                                | 0.0016 (10)     | 0.0016 (10)     | 0.0018 (14)     | 0.0008 (5)      | 0.000           | 0.000           |

**Table S3.** Selected bond lengths (Å) for BaZnBe<sub>2</sub>(BO<sub>3</sub>)<sub>2</sub>F<sub>2</sub>.

| <b>BaZnBe<sub>2</sub>(BO<sub>3</sub>)<sub>2</sub>F<sub>2</sub></b> |            |                         |            |
|--------------------------------------------------------------------|------------|-------------------------|------------|
| Zn-O1                                                              | 2.136 (3)  | Ba-O1 <sup>v</sup>      | 3.024 (3)  |
| Zn-O1 <sup>i</sup>                                                 | 2.136 (3)  | Ba-O1 <sup>ii</sup>     | 3.024 (3)  |
| Zn-O1 <sup>ii</sup>                                                | 2.136 (3)  | Ba-O1 <sup>xi</sup>     | 3.024 (3)  |
| Zn-O1 <sup>iii</sup>                                               | 2.136 (3)  | Ba-O1 <sup>iii</sup>    | 3.024 (3)  |
| Zn-O1 <sup>iv</sup>                                                | 2.136 (3)  | Ba-O1 <sup>xii</sup>    | 3.024 (3)  |
| Zn-O1 <sup>v</sup>                                                 | 2.136 (3)  | Ba-O1 <sup>xiii</sup>   | 3.024 (3)  |
| Zn-Ba <sup>vi</sup>                                                | 3.8518 (5) | Ba-F1 <sup>xiv</sup>    | 2.7020 (8) |
| Zn-Ba                                                              | 3.8518 (5) | Ba-F1 <sup>xii</sup>    | 2.7020 (8) |
| O1-B1 <sup>vii</sup>                                               | 1.375 (3)  | Ba-F1 <sup>xv</sup>     | 2.7020 (8) |
| O1-Ba <sup>vi</sup>                                                | 3.024 (3)  | Ba-F1 <sup>xvi</sup>    | 2.7020 (8) |
| O1-Be1                                                             | 1.621 (3)  | Ba-F1 <sup>xvii</sup>   | 2.7020 (8) |
| B1-O1 <sup>viii</sup>                                              | 1.375 (3)  | Ba-F1 <sup>v</sup>      | 2.7020 (8) |
| B1-O1 <sup>iii</sup>                                               | 1.375 (3)  | Be1-O1 <sup>xviii</sup> | 1.621 (3)  |
| B1-O1 <sup>vii</sup>                                               | 1.375 (3)  | Be1-O1 <sup>xix</sup>   | 1.621 (3)  |
| F1-Ba <sup>ix</sup>                                                | 2.7020 (8) | Be1-Ba <sup>vi</sup>    | 3.394 (5)  |
| F1-Ba <sup>x</sup>                                                 | 2.7020 (8) | Be1-Ba <sup>x</sup>     | 3.394 (5)  |
| F1-Ba <sup>vi</sup>                                                | 2.7020 (8) | Be1-Ba <sup>ix</sup>    | 3.394 (5)  |
| F1-Be1                                                             | 1.615 (9)  |                         |            |

Symmetry codes: (i)  $-x+y+1, -x-1, z$ ; (ii)  $x-y-1, x-1, -z$ ; (iii)  $y+1, -x+y, -z$ ; (iv)  $-y-1, x-y-2, z$ ; (v)  $-x, -y-2, -z$ ; (vi)  $x, y, z-1$ ; (vii)  $-x, -y-1, -z$ ; (viii)  $x-y, x, -z$ ; (ix)  $x-1, y, z-1$ ; (x)  $x-1, y-1, z-1$ ; (xi)  $-y-1, x-y-2, z+1$ ; (xii)  $x, y, z+1$ ; (xiii)  $-x+y+1, -x-1, z+1$ ; (xiv)  $-x-1, -y-2, -z$ ; (xv)  $x+1, y+1, z+1$ ; (xvi)  $x+1, y, z+1$ ; (xvii)  $-x-1, -y-3, -z$ ; (xviii)  $-y-2, x-y-2, z$ ; (xix)  $-x+y, -x-2, z$ .

**Table S4.** Selected bond angles (degree) for BaZnBe<sub>2</sub>(BO<sub>3</sub>)<sub>2</sub>F<sub>2</sub>.

|                                        |             |                                           |             |
|----------------------------------------|-------------|-------------------------------------------|-------------|
| O1-Zn-O1 <sup>iii</sup>                | 94.75 (11)  | F1 <sup>xii</sup> -Ba-O1 <sup>xii</sup>   | 52.74 (9)   |
| O1 <sup>iv</sup> -Zn-O1 <sup>ii</sup>  | 94.75 (11)  | F1 <sup>v</sup> -Ba-O1 <sup>xi</sup>      | 100.87 (9)  |
| O1 <sup>v</sup> -Zn-O1 <sup>i</sup>    | 94.75 (11)  | F1 <sup>xvi</sup> -Ba-O1 <sup>ii</sup>    | 100.87 (9)  |
| O1-Zn-O1 <sup>iv</sup>                 | 85.25 (11)  | F1 <sup>xvii</sup> -Ba-O1 <sup>xiii</sup> | 127.26 (9)  |
| O1-Zn-O1 <sup>i</sup>                  | 85.25 (11)  | F1 <sup>xvii</sup> -Ba-O1 <sup>ii</sup>   | 52.74 (9)   |
| O1 <sup>iii</sup> -Zn-O1 <sup>iv</sup> | 180.00 (11) | F1 <sup>xvii</sup> -Ba-O1 <sup>iii</sup>  | 109.45 (10) |
| O1 <sup>iii</sup> -Zn-O1 <sup>ii</sup> | 85.25 (11)  | F1 <sup>xiv</sup> -Ba-O1 <sup>v</sup>     | 109.45 (10) |
| O1-Zn-O1 <sup>v</sup>                  | 180.0       | F1 <sup>v</sup> -Ba-O1 <sup>xiii</sup>    | 70.55 (10)  |
| O1 <sup>v</sup> -Zn-O1 <sup>ii</sup>   | 85.25 (11)  | F1 <sup>xvi</sup> -Ba-O1 <sup>v</sup>     | 70.55 (10)  |
| O1 <sup>iii</sup> -Zn-O1 <sup>v</sup>  | 85.25 (11)  | F1 <sup>xvi</sup> -Ba-O1 <sup>xii</sup>   | 109.45 (10) |
| O1 <sup>iii</sup> -Zn-O1 <sup>i</sup>  | 94.75 (11)  | F1 <sup>xv</sup> -Ba-O1 <sup>v</sup>      | 100.87 (9)  |
| O1 <sup>iv</sup> -Zn-O1 <sup>v</sup>   | 94.75 (11)  | F1 <sup>xii</sup> -Ba-O1 <sup>xi</sup>    | 79.13 (9)   |
| O1 <sup>ii</sup> -Zn-O1 <sup>i</sup>   | 180.0       | F1 <sup>v</sup> -Ba-O1 <sup>v</sup>       | 52.74 (9)   |
| O1-Zn-O1 <sup>ii</sup>                 | 94.75 (11)  | F1 <sup>xvi</sup> -Ba-O1 <sup>xiii</sup>  | 79.13 (9)   |
| O1 <sup>iv</sup> -Zn-O1 <sup>i</sup>   | 85.25 (11)  | F1 <sup>xii</sup> -Ba-O1 <sup>v</sup>     | 127.26 (10) |
| O1-Zn-Ba <sup>vi</sup>                 | 51.44 (7)   | F1 <sup>xv</sup> -Ba-O1 <sup>xiii</sup>   | 52.74 (9)   |
| O1 <sup>v</sup> -Zn-Ba                 | 51.44 (7)   | F1 <sup>xv</sup> -Ba-O1 <sup>ii</sup>     | 127.26 (9)  |
| O1 <sup>iii</sup> -Zn-Ba               | 51.44 (7)   | F1 <sup>xvi</sup> -Ba-O1 <sup>iii</sup>   | 127.26 (9)  |
| O1 <sup>iv</sup> -Zn-Ba <sup>vi</sup>  | 51.44 (7)   | F1 <sup>v</sup> -Ba-O1 <sup>ii</sup>      | 109.45 (10) |
| O1-Zn-O1 <sup>iii</sup>                | 94.75 (11)  | F1 <sup>xii</sup> -Ba-O1 <sup>xii</sup>   | 52.74 (9)   |
| O1 <sup>iv</sup> -Zn-O1 <sup>ii</sup>  | 94.75 (11)  | F1 <sup>v</sup> -Ba-O1 <sup>xi</sup>      | 100.87 (9)  |
| O1 <sup>v</sup> -Zn-O1 <sup>i</sup>    | 94.75 (11)  | F1 <sup>xvi</sup> -Ba-O1 <sup>ii</sup>    | 100.87 (9)  |
| O1-Zn-O1 <sup>iv</sup>                 | 85.25 (11)  | F1 <sup>xvii</sup> -Ba-O1 <sup>xiii</sup> | 127.26 (9)  |
| O1-Zn-O1 <sup>i</sup>                  | 85.25 (11)  | F1 <sup>xvii</sup> -Ba-O1 <sup>ii</sup>   | 52.74 (9)   |
| O1 <sup>iii</sup> -Zn-O1 <sup>iv</sup> | 180.00 (11) | F1 <sup>xvii</sup> -Ba-O1 <sup>iii</sup>  | 109.45 (10) |
| O1 <sup>iii</sup> -Zn-O1 <sup>ii</sup> | 85.25 (11)  | F1 <sup>xiv</sup> -Ba-O1 <sup>v</sup>     | 109.45 (10) |
| O1-Zn-O1 <sup>v</sup>                  | 180.0       | F1 <sup>v</sup> -Ba-O1 <sup>xiii</sup>    | 70.55 (10)  |
| O1 <sup>v</sup> -Zn-O1 <sup>ii</sup>   | 85.25 (11)  | F1 <sup>xvi</sup> -Ba-O1 <sup>v</sup>     | 70.55 (10)  |
| O1 <sup>iii</sup> -Zn-O1 <sup>v</sup>  | 85.25 (11)  | F1 <sup>xvi</sup> -Ba-O1 <sup>xii</sup>   | 109.45 (10) |
| O1 <sup>iii</sup> -Zn-O1 <sup>i</sup>  | 94.75 (11)  | F1 <sup>xv</sup> -Ba-O1 <sup>v</sup>      | 100.87 (9)  |
| O1 <sup>iv</sup> -Zn-O1 <sup>v</sup>   | 94.75 (11)  | F1 <sup>xii</sup> -Ba-O1 <sup>xi</sup>    | 79.13 (9)   |
| O1 <sup>ii</sup> -Zn-O1 <sup>i</sup>   | 180.0       | F1 <sup>v</sup> -Ba-O1 <sup>v</sup>       | 52.74 (9)   |
| O1-Zn-O1 <sup>ii</sup>                 | 94.75 (11)  | F1 <sup>xvi</sup> -Ba-O1 <sup>xiii</sup>  | 79.13 (9)   |
| O1 <sup>iv</sup> -Zn-O1 <sup>i</sup>   | 85.25 (11)  | F1 <sup>xii</sup> -Ba-O1 <sup>v</sup>     | 127.26 (10) |
| O1-Zn-Ba <sup>vi</sup>                 | 51.44 (7)   | F1 <sup>xv</sup> -Ba-O1 <sup>xiii</sup>   | 52.74 (9)   |
| O1 <sup>v</sup> -Zn-Ba                 | 51.44 (7)   | F1 <sup>xv</sup> -Ba-O1 <sup>ii</sup>     | 127.26 (9)  |
| O1 <sup>iii</sup> -Zn-Ba               | 51.44 (7)   | F1 <sup>xvi</sup> -Ba-O1 <sup>iii</sup>   | 127.26 (9)  |
| O1 <sup>iv</sup> -Zn-Ba <sup>vi</sup>  | 51.44 (7)   | F1 <sup>v</sup> -Ba-O1 <sup>ii</sup>      | 109.45 (10) |
| O1 <sup>i</sup> -Zn-Ba                 | 128.56 (7)  | F1 <sup>xv</sup> -Ba-O1 <sup>iii</sup>    | 70.55 (10)  |
| O1 <sup>v</sup> -Zn-Ba <sup>vi</sup>   | 128.56 (7)  | F1 <sup>xii</sup> -Ba-O1 <sup>ii</sup>    | 70.55 (10)  |
| O1 <sup>iv</sup> -Zn-Ba                | 128.56 (7)  | F1 <sup>xii</sup> -Ba-O1 <sup>iii</sup>   | 100.87 (9)  |
| O1 <sup>ii</sup> -Zn-Ba <sup>vi</sup>  | 128.56 (7)  | F1 <sup>xiv</sup> -Ba-O1 <sup>xi</sup>    | 127.26 (9)  |
| O1 <sup>ii</sup> -Zn-Ba                | 51.44 (7)   | F1 <sup>xii</sup> -Ba-O1 <sup>xiii</sup>  | 109.45 (10) |

|                                          |              |                                              |             |
|------------------------------------------|--------------|----------------------------------------------|-------------|
| O1 <sup>i</sup> -Zn-Ba <sup>vi</sup>     | 51.44 (7)    | F1 <sup>xvi</sup> -Ba-O1 <sup>xi</sup>       | 52.74 (9)   |
| O1-Zn-Ba                                 | 128.56 (7)   | F1 <sup>xiv</sup> -Ba-O1 <sup>xii</sup>      | 70.55 (10)  |
| O1 <sup>iii</sup> -Zn-Ba <sup>vi</sup>   | 128.56 (7)   | F1 <sup>xvii</sup> -Ba-O1 <sup>xi</sup>      | 70.55 (10)  |
| Ba <sup>vi</sup> -Zn-Ba                  | 180.0        | F1 <sup>xv</sup> -Ba-O1 <sup>xi</sup>        | 109.45 (10) |
| Zn-O1-Ba <sup>vi</sup>                   | 95.03 (9)    | F1 <sup>xvii</sup> -Ba-O1 <sup>v</sup>       | 79.13 (9)   |
| B1 <sup>vii</sup> -O1-Zn                 | 113.8 (3)    | F1 <sup>xvii</sup> -Ba-F1 <sup>xv</sup>      | 180.00 (17) |
| B1 <sup>vii</sup> -O1-Ba <sup>vi</sup>   | 106.6 (3)    | F1 <sup>v</sup> -Ba-F1 <sup>xii</sup>        | 180.0       |
| B1 <sup>vii</sup> -O1-Be1                | 127.3 (2)    | F1 <sup>xiv</sup> -Ba-F1 <sup>xv</sup>       | 63.32 (5)   |
| Be1-O1-Zn                                | 114.6 (2)    | F1 <sup>xiv</sup> -Ba-F1 <sup>v</sup>        | 116.68 (5)  |
| Be1-O1-Ba <sup>vi</sup>                  | 88.5 (3)     | F1 <sup>xiv</sup> -Ba-F1 <sup>xvii</sup>     | 116.68 (5)  |
| O1 <sup>vii</sup> -B1-O1 <sup>iii</sup>  | 120.000 (1)  | F1 <sup>xvi</sup> -Ba-F1 <sup>v</sup>        | 63.32 (5)   |
| O1 <sup>vii</sup> -B1-O1 <sup>viii</sup> | 120.000 (1)  | F1 <sup>xvii</sup> -Ba-F1 <sup>xii</sup>     | 63.32 (5)   |
| O1 <sup>iii</sup> -B1-O1 <sup>viii</sup> | 120.000 (1)  | F1 <sup>xvii</sup> -Ba-F1 <sup>v</sup>       | 116.68 (5)  |
| Ba <sup>ix</sup> -F1-Ba <sup>vi</sup>    | 116.68 (5)   | F1 <sup>xiv</sup> -Ba-F1 <sup>xvi</sup>      | 180.0       |
| Ba <sup>ix</sup> -F1-Ba <sup>x</sup>     | 116.68 (5)   | F1 <sup>xv</sup> -Ba-F1 <sup>v</sup>         | 63.32 (5)   |
| Ba <sup>x</sup> -F1-Ba <sup>vi</sup>     | 116.68 (5)   | F1 <sup>xvi</sup> -Ba-F1 <sup>xvii</sup>     | 63.32 (5)   |
| Be1-F1-Ba <sup>x</sup>                   | 100.62 (9)   | F1 <sup>xiv</sup> -Ba-F1 <sup>xii</sup>      | 63.32 (5)   |
| Be1-F1-Ba <sup>ix</sup>                  | 100.62 (9)   | F1 <sup>xvi</sup> -Ba-F1 <sup>xv</sup>       | 116.68 (5)  |
| Be1-F1-Ba <sup>vi</sup>                  | 100.62 (9)   | F1 <sup>xvi</sup> -Ba-F1 <sup>xii</sup>      | 116.68 (5)  |
| O1 <sup>v</sup> -Ba-O1 <sup>xi</sup>     | 122.84 (8)   | F1 <sup>xv</sup> -Ba-F1 <sup>xii</sup>       | 116.68 (5)  |
| O1 <sup>xiii</sup> -Ba-O1 <sup>v</sup>   | 122.84 (8)   | O1 <sup>xviii</sup> -Be1-O1 <sup>xix</sup>   | 113.9 (2)   |
| O1 <sup>xiii</sup> -Ba-O1 <sup>xi</sup>  | 57.16 (8)    | O1-Be1-O1 <sup>xix</sup>                     | 113.9 (2)   |
| O1 <sup>xii</sup> -Ba-O1 <sup>v</sup>    | 180.00 (11)  | O1 <sup>xviii</sup> -Be1-O1                  | 113.9 (2)   |
| O1 <sup>v</sup> -Ba-O1 <sup>iii</sup>    | 57.16 (8)    | O1 <sup>xviii</sup> -Be1-Ba <sup>ix</sup>    | 62.94 (19)  |
| O1 <sup>ii</sup> -Ba-O1 <sup>xi</sup>    | 122.84 (8)   | O1 <sup>xix</sup> -Be1-Ba <sup>x</sup>       | 62.94 (19)  |
| O1 <sup>xiii</sup> -Ba-O1 <sup>iii</sup> | 122.84 (8)   | O1-Be1-Ba <sup>vi</sup>                      | 62.95 (19)  |
| O1 <sup>xii</sup> -Ba-O1 <sup>xi</sup>   | 57.16 (8)    | O1-Be1-Ba <sup>ix</sup>                      | 94.28 (18)  |
| O1 <sup>ii</sup> -Ba-O1 <sup>v</sup>     | 57.16 (8)    | O1 <sup>xviii</sup> -Be1-Ba <sup>vi</sup>    | 148.1 (3)   |
| O1 <sup>ii</sup> -Ba-O1 <sup>iii</sup>   | 57.16 (8)    | O1 <sup>xix</sup> -Be1-Ba <sup>ix</sup>      | 148.1 (3)   |
| O1 <sup>ii</sup> -Ba-O1 <sup>xiii</sup>  | 180.00 (6)   | O1 <sup>xix</sup> -Be1-Ba <sup>vi</sup>      | 94.28 (18)  |
| O1 <sup>xii</sup> -Ba-O1 <sup>iii</sup>  | 122.84 (8)   | O1-Be1-Ba <sub>x</sub>                       | 148.1 (3)   |
| O1 <sup>ii</sup> -Ba-O1 <sup>xii</sup>   | 122.84 (8)   | O1 <sup>xviii</sup> -Be1-Ba <sub>x</sub>     | 94.28 (18)  |
| O1 <sup>xi</sup> -Ba-O1 <sup>iii</sup>   | 180.00 (11)  | F1-Be1-O1 <sub>xix</sub>                     | 104.5 (3)   |
| O1 <sup>xiii</sup> -Ba-O1 <sup>xii</sup> | 57.16 (8)    | F1-Be1-O1                                    | 104.5 (3)   |
| F1 <sup>xvii</sup> -Ba-O1 <sup>xii</sup> | 100.87 (9)   | F1-Be1-O1 <sup>xviii</sup>                   | 104.5 (3)   |
| F1 <sup>xiv</sup> -Ba-O1 <sup>ii</sup>   | 79.13 (9)    | F1-Be1-Ba <sub>vi</sub>                      | 51.49 (11)  |
| F1 <sup>xiv</sup> -Ba-O1 <sup>iii</sup>  | 52.74 (9)    | F1-Be1-Ba <sub>x</sub>                       | 51.49 (11)  |
| F1 <sup>xv</sup> -Ba-O1 <sup>xii</sup>   | 79.13 (9)    | F1-Be1-Ba <sub>ix</sub>                      | 51.49 (11)  |
| F1 <sup>xiv</sup> -Ba-O1 <sup>xiii</sup> | 100.87 (9)   | Ba <sub>x</sub> -Be1-Ba <sub>vi</sub>        | 85.32 (16)  |
| F1 <sup>v</sup> -Ba-O1 <sup>xii</sup>    | 127.26 (9)   | Ba <sub>ix</sub> -Be1-Ba <sub>x</sub>        | 85.32 (16)  |
| F1 <sup>v</sup> -Ba-O1 <sup>iii</sup>    | 79.13 (9)    | Ba <sub>ix</sub> -Be1-Ba <sub>vi</sub>       | 85.32 (16)  |
| Zn-O1-Be1-O1 <sup>xix</sup>              | -12.6 (6)    | Ba <sub>vi</sub> -O1-Be1-Ba <sub>ix</sub>    | -82.52 (14) |
| Zn-O1-Be1-O1 <sup>xviii</sup>            | 120.4 (3)    | Ba <sub>vi</sub> -F1-Be1-O1 <sup>xviii</sup> | 156.20 (10) |
| Zn-O1-Be-F1                              | -126.12 (16) | Ba <sub>ix</sub> -F1-Be1-O1 <sub>xix</sub>   | 156.20 (10) |



|                                               |              |                                              |              |
|-----------------------------------------------|--------------|----------------------------------------------|--------------|
| Zn-O1-Be1-Ba <sup>vi</sup>                    | -94.86 (18)  | Ba <sup>x</sup> -F1-Be1-O1                   | 156.20 (10)  |
| Zn-O1-Be1-Ba <sup>ix</sup>                    | -177.38 (12) | Ba <sup>ix</sup> -F1-Be1-O1 <sup>xviii</sup> | 36.20 (10)   |
| Zn-O1-Be1-Ba <sup>x</sup>                     | -89.4 (6)    | Ba <sup>x</sup> -F1-Be1-O1 <sup>xviii</sup>  | -83.80 (10)  |
| B1 <sup>vii</sup> -O1-Be1-O1 <sup>xviii</sup> | -34.9 (9)    | Ba <sup>x</sup> -F1-Be1-O1 <sup>xix</sup>    | 36.20 (10)   |
| B1 <sup>vii</sup> -O1-Be1-O1 <sup>xix</sup>   | -167.9 (4)   | Ba <sup>ix</sup> -F1-Be1-O1                  | -83.80 (10)  |
| B1 <sup>vii</sup> -O1-Be1-F1                  | 78.6 (5)     | Ba <sup>vi</sup> -F1-Be1-O1 <sup>xix</sup>   | -83.80 (10)  |
| B1 <sup>vii</sup> -O1-Be1-Ba <sup>vi</sup>    | 109.9 (5)    | Ba <sup>vi</sup> -F1-Be1-O1                  | 36.20 (10)   |
| B1 <sup>vii</sup> -O1-Be1-Ba <sup>x</sup>     | 115.3 (5)    | Ba <sup>ix</sup> -F1-Be1-Ba <sup>vi</sup>    | -120.000 (1) |
| B1 <sup>vii</sup> -O1-Be1-Ba <sup>ix</sup>    | 27.3 (6)     | Ba <sup>vi</sup> -F1-Be1-Ba <sup>x</sup>     | -120.000 (1) |
| Ba <sup>vi</sup> -O1-Be1-O1 <sup>xix</sup>    | 82.2 (4)     | Ba <sup>vi</sup> -F1-Be1-Ba <sup>ix</sup>    | 120.000 (1)  |
| Ba <sup>vi</sup> -O1-Be1-O1 <sup>xviii</sup>  | -144.8 (4)   | Ba <sup>ix</sup> -F1-Be1-Ba <sup>x</sup>     | 120.000 (1)  |
| Ba <sup>vi</sup> -O1-Be1-F1                   | -31.26 (7)   | Ba <sup>x</sup> -F1-Be1-Ba <sup>vi</sup>     | 120.000 (1)  |
| Ba <sup>vi</sup> -O1-Be1-Ba <sup>x</sup>      | 5.5 (5)      | Ba <sup>x</sup> -F1-Be1-Ba <sup>ix</sup>     | -120.000 (1) |
